# Supplementary material
Source: PubMed Central journal article supplement (PMC4814354)
Supplement: NIHMS763048-supplement-Supplemental.pdf [file NIHMS763048-supplement-Supplemental.pdf]

**Supplemental table S1. Clinical characteristics of the patients with STAT3 mutations.**

| Exome sequencing    | Variant | VAF      | Sex | Age | Hb    | Leuk | Lymph | Neut | Throm | Vbeta      | Concomitant disorders                                         |
|---------------------|---------|----------|-----|-----|-------|------|-------|------|-------|------------|---------------------------------------------------------------|
| Patient 1<br>T-LGL  | H410R   | 49% CD8+ | M   | 60  | 85,0  | 10,2 | 1,6   | 1,4  | 203,0 | vb.17: 95% | Anemia, neutropenia, B-cell dyscrasia, hypergammaglobulinemia |
| Amplicon sequencing |         |          |     |     |       |      |       |      |       |            |                                                               |
| Patient 2<br>T-LGL  | H410R   | 9% MNC   | F   | 75  | 127,0 | 4,2  | 3,7   | 0,0  | 260,0 | NA         | Neutropenia                                                   |
| Patient 3<br>T-LGL  | S381Y   | 7% MNC   | F   | 20  | 108,0 | 7,0  | 4,7   | 2,0  | 181,0 | NA         | Anemia                                                        |
| Patient 4<br>T-LGL  | F174S   | 54% CD8+ | M   | 68  | 95,0  | 8,6  | 7,2   | 1,1  | 211,0 | NA         | Anemia, neutropenia                                           |

Abbreviations: M, male; F, female; VAF, variant allele frequency; Hb, hemoglobin; Leuk, leukocytes; Lymph, lymphocytes; Neut, neutrophils; Throm, thrombocytes

**Supplemental table S2. Exome sequencing results from index patient E1 and patients E2-E7.**

**Index patient 1**

| chrom | pos       | ref | var | Gene      | Effect                | Effect Impact | Codon Change | Amino Acid Change | Normal reads <sup>1</sup> | Normal reads <sup>2</sup> | Normal var_freq | Tumor Reads <sup>3</sup> |
|-------|-----------|-----|-----|-----------|-----------------------|---------------|--------------|-------------------|---------------------------|---------------------------|-----------------|--------------------------|
| chr17 | 40481576  | T   | C   | STAT3     | NON_SYNONYMOUS_CODING | MODERATE      | cAc/cGc      | H410R             | 81                        | 1                         | 1,22            | 68                       |
| chr6  | 26285607  | G   | C   | HIST1H4H  | NON_SYNONYMOUS_CODING | MODERATE      | Cgc/Ggc      | R41G              | 89                        | 1                         | 1,11            | 74                       |
| chr19 | 48640278  | G   | A   | LIG1      | NON_SYNONYMOUS_CODING | MODERATE      | Cgg/Tgg      | R440W             | 68                        | 1                         | 1,45            | 52                       |
| chr10 | 18789769  | G   | T   | CACNB2    | NON_SYNONYMOUS_CODING | MODERATE      | cGa/cTa      | R162L             | 45                        | 1                         | 2,17            | 50                       |
| chr19 | 50910609  | C   | T   | POLD1     | NON_SYNONYMOUS_CODING | MODERATE      | cCc/cTc      | P571L             | 44                        | 0                         | 0               | 25                       |
| chr3  | 38616913  | C   | T   | SCN5A     | NON_SYNONYMOUS_CODING | MODERATE      | Gtg/Atg      | V1181M            | 38                        | 1                         | 2,56            | 63                       |
| chr21 | 10934987  | C   | T   | TPTE      | NON_SYNONYMOUS_CODING | MODERATE      | cGg/cAg      | R269Q             | 91                        | 0                         | 0               | 118                      |
| chr6  | 39869697  | C   | T   | DAAM2     | NON_SYNONYMOUS_CODING | MODERATE      | Cgc/Tgc      | R1031C            | 37                        | 0                         | 0               | 31                       |
| chr14 | 100743840 | A   | G   | YY1       | NON_SYNONYMOUS_CODING | MODERATE      | tAt/tGt      | Y383C             | 39                        | 0                         | 0               | 45                       |
| chr16 | 1129599   | G   | A   | SSTR5     | NON_SYNONYMOUS_CODING | MODERATE      | cGg/cAg      | R244Q             | 9                         | 0                         | 0               | 2                        |
| chr19 | 46215222  | C   | T   | FBXO46    | NON_SYNONYMOUS_CODING | MODERATE      | gGc/gAc      | G511D             | 22                        | 0                         | 0               | 20                       |
| chr5  | 71495673  | C   | T   | MAP1B     | NON_SYNONYMOUS_CODING | MODERATE      | cCg/cTg      | P2164L            | 28                        | 0                         | 0               | 28                       |
| chr5  | 176308804 | C   | T   | HK3       | NON_SYNONYMOUS_CODING | MODERATE      | cGc/cAc      | R761H             | 30                        | 0                         | 0               | 32                       |
| chr14 | 57947415  | G   | A   | C14orf105 | NON_SYNONYMOUS_CODING | MODERATE      | Cca/Tca      | P184S             | 19                        | 0                         | 0               | 21                       |
| chr16 | 89805925  | G   | C   | FANCA     | NON_SYNONYMOUS_CODING | MODERATE      | cCg/cGg      | P1324R            | 15                        | 0                         | 0               | 15                       |
| chr14 | 58813218  | G   | A   | ARID4A    | NON_SYNONYMOUS_CODING | MODERATE      | Gac/Aac      | D357N             | 10                        | 0                         | 0               | 13                       |
| chr20 | 17640518  | G   | A   | RRBP1     | NON_SYNONYMOUS_CODING | MODERATE      | gCt/gTt      | A212V             | 20                        | 0                         | 0               | 13                       |
| chr15 | 63901315  | C   | T   | HERC1     | NON_SYNONYMOUS_CODING | MODERATE      | Gtg/Atg      | V4851M            | 34                        | 0                         | 0               | 48                       |
| chr12 | 49436629  | G   | A   | MLL2      | STOP_GAINED           | HIGH          | Cag/Tag      | Q1893*            | 39                        | 0                         | 0               | 81                       |

## Patient E2

| chrom | pos       | ref     | var  | Gene     | Effect                | Effect Impact | Codon Change  | Amino Acid Change | Normal reads1 | Normal reads2 | Normal var_freq | Tum read |
|-------|-----------|---------|------|----------|-----------------------|---------------|---------------|-------------------|---------------|---------------|-----------------|----------|
| chr19 | 58385748  | G       | A    | ZNF814   | NON_SYNONYMOUS_CODING | MODERATE      | gCt/gTt       | A337V             | 189           | 1             | 0,53            | 25       |
| chr13 | 38266376  | T       | C    | TRPC4    | NON_SYNONYMOUS_CODING | MODERATE      | Aca/Gca       | T332A             | 65            | 1             | 1,52            | 26       |
| chr2  | 120438592 | G       | A    | TMEM177  | NON_SYNONYMOUS_CODING | MODERATE      | Gct/Act       | A55T              | 53            | 0             | 0               | 29       |
| chr15 | 45386840  | G       | A    | DUOX2    | NON_SYNONYMOUS_CODING | MODERATE      | aCg/aTg       | T1482M            | 38            | 0             | 0               | 31       |
| chr7  | 70236631  | G       | C    | AUTS2    | SPLICE_SITE_DONOR     | HIGH          |               |                   | 47            | 1             | 2,08            | 28       |
| chr1  | 42914260  | T       | A    | ZMYND12  | NON_SYNONYMOUS_CODING | MODERATE      | gAa/gTa       | E101V             | 42            | 2             | 4,55            | 25       |
| chr22 | 29885598  | AAGGAAG | A    | NEFH     | CODON_DELETION        | MODERATE      | aaggaagag/aag | KEE657K           | 50            | 2             | 3,85            | 76       |
| chr3  | 137956387 | T       | C    | ARMC8    | NON_SYNONYMOUS_CODING | MODERATE      | aTt/aCt       | I250T             | 60            | 2             | 3,23            | 37       |
| chr5  | 171766472 | G       | A    | SH3PXD2B | NON_SYNONYMOUS_CODING | MODERATE      | aCg/aTg       | T546M             | 28            | 1             | 3,45            | 24       |
| chr15 | 68642973  | T       | C    | ITGA11   | NON_SYNONYMOUS_CODING | MODERATE      | Aga/Gga       | R348G             | 63            | 1             | 1,56            | 73       |
| chr20 | 61467852  | G       | A    | COL9A3   | NON_SYNONYMOUS_CODING | MODERATE      | cGc/cAc       | R524H             | 28            | 0             | 0               | 30       |
| chr4  | 122831309 | C       | T    | TRPC3    | NON_SYNONYMOUS_CODING | MODERATE      | Gct/Act       | A598T             | 28            | 1             | 3,45            | 17       |
| chr4  | 52862277  | C       | T    | LRRC66   | NON_SYNONYMOUS_CODING | MODERATE      | cGc/cAc       | R304H             | 23            | 0             | 0               | 14       |
| chr9  | 71002447  | A       | G    | PGM5     | NON_SYNONYMOUS_CODING | MODERATE      | Aag/Gag       | K214E             | 66            | 1             | 1,49            | 45       |
| chr21 | 46604883  | G       | A    | ADARB1   | NON_SYNONYMOUS_CODING | MODERATE      | cGg/cAg       | R521Q             | 40            | 1             | 2,44            | 42       |
| chr5  | 151047138 | C       | A    | SPARC    | STOP_GAINED           | HIGH          | Gag/Tag       | E159*             | 14            | 0             | 0               | 10       |
| chr11 | 102056815 | A       | G    | YAP1     | NON_SYNONYMOUS_CODING | MODERATE      | aAg/aGg       | K252R             | 68            | 3             | 4,23            | 70       |
| chr11 | 16340159  | C       | T    | SOX6     | NON_SYNONYMOUS_CODING | MODERATE      | cGa/cAa       | R93Q              | 25            | 1             | 3,85            | 22       |
| chr3  | 180322347 | G       | C    | TTC14    | NON_SYNONYMOUS_CODING | MODERATE      | gGt/gCt       | G218A             | 93            | 0             | 0               | 90       |
| chr9  | 116268683 | G       | A    | RGS3     | NON_SYNONYMOUS_CODING | MODERATE      | cGg/cAg       | R332Q             | 20            | 0             | 0               | 27       |
| chr19 | 58385906  | G       | C    | ZNF814   | NON_SYNONYMOUS_CODING | MODERATE      | ttC/ttG       | F284L             | 196           | 2             | 1,01            | 13       |
| chr1  | 89449029  | A       | G    | RBMXL1   | NON_SYNONYMOUS_CODING | MODERATE      | Tct/Cct       | S161P             | 276           | 12            | 4,17            | 37       |
| chr16 | 30531243  | C       | CG   | ITGAL    | FRAME_SHIFT           | HIGH          | -/G           | -1099             | 10            | 0             | 0               | 8        |
| chr1  | 152681692 | CTGTGGT | C    | LCE4A    | CODON_DELETION        | MODERATE      | tgtgt/-       | CG48-             | 45            | 1             | 2,17            | 61       |
| chr7  | 19184746  | C       | CTCT | FERD3L   | CODON_INSERTION       | MODERATE      | gag/gAGAag    | E80EK             | 8             | 1             | 11,11           | 7        |

### Patient E3

| chrom | pos       | ref | var | Gene     | Effect                | Effect Impact | Codon Change | Amino Acid Change | Normal reads1 | Normal reads2 | Normal var_freq | Tumor reads1 |
|-------|-----------|-----|-----|----------|-----------------------|---------------|--------------|-------------------|---------------|---------------|-----------------|--------------|
| chr4  | 86844810  | G   | A   | ARHGAP24 | NON_SYNONYMOUS_CODING | MODERATE      | cGa/cAa      | R93Q              | 91            | 3             | 3,19            | 31           |
| chr1  | 176734840 | C   | T   | PAPPA2   | NON_SYNONYMOUS_CODING | MODERATE      | cCg/cTg      | P1397L            | 66            | 1             | 1,49            | 34           |
| chr1  | 183093952 | G   | A   | LAMC1    | NON_SYNONYMOUS_CODING | MODERATE      | cGg/cAg      | R863Q             | 63            | 0             | 0               | 33           |
| chr5  | 32052757  | C   | T   | PDZD2    | NON_SYNONYMOUS_CODING | MODERATE      | aCg/aTg      | T569M             | 80            | 1             | 1,23            | 45           |
| chr1  | 19505624  | G   | T   | UBR4     | NON_SYNONYMOUS_CODING | MODERATE      | Cgc/Agc      | R759S             | 81            | 1             | 1,22            | 66           |
| chr15 | 41861215  | G   | A   | TYRO3    | NON_SYNONYMOUS_CODING | MODERATE      | cGt/cAt      | R416H             | 68            | 2             | 2,86            | 29           |
| chr10 | 68857522  | C   | T   | LRRTM3   | STOP_GAINED           | HIGH          | Cga/Tga      | R572*             | 77            | 4             | 4,94            | 52           |
| chr12 | 122406062 | A   | T   | WDR66    | STOP_GAINED           | HIGH          | Aaa/Taa      | K920*             | 42            | 1             | 2,33            | 23           |
| chr6  | 108985555 | C   | T   | FOXO3    | NON_SYNONYMOUS_CODING | MODERATE      | Cgg/Tgg      | R507W             | 180           | 0             | 0               | 179          |
| chr1  | 156449103 | C   | G   | MEF2D    | NON_SYNONYMOUS_CODING | MODERATE      | Gga/Cga      | G215R             | 50            | 2             | 3,85            | 35           |
| chr7  | 82452006  | C   | T   | PCLO     | SPLICE_SITE_ACCEPTOR  | HIGH          |              |                   | 22            | 1             | 4,35            | 9            |
| chr22 | 20130876  | G   | T   | ZDHHC8   | NON_SYNONYMOUS_CODING | MODERATE      | Gac/Tac      | D575Y             | 25            | 1             | 3,85            | 17           |
| chr19 | 57175488  | C   | T   | ZNF835   | NON_SYNONYMOUS_CODING | MODERATE      | cGg/cAg      | R382Q             | 26            | 1             | 3,7             | 21           |
| chr17 | 54431314  | G   | A   | ANKFN1   | NON_SYNONYMOUS_CODING | MODERATE      | Gag/Aag      | E173K             | 57            | 2             | 3,39            | 40           |
| chr3  | 53226178  | C   | T   | PRKCD    | NON_SYNONYMOUS_CODING | MODERATE      | Cgc/Tgc      | R643C             | 28            | 0             | 0               | 21           |
| chr2  | 197537109 | C   | T   | CCDC150  | NON_SYNONYMOUS_CODING | MODERATE      | gCa/gTa      | A326V             | 57            | 2             | 3,39            | 40           |
| chr15 | 88472429  | T   | C   | NTRK3    | NON_SYNONYMOUS_CODING | MODERATE      | tAt/tGt      | Y709C             | 20            | 0             | 0               | 22           |
| chr5  | 140605446 | G   | A   | PCDHB14  | NON_SYNONYMOUS_CODING | MODERATE      | cGa/cAa      | R790Q             | 151           | 1             | 0,66            | 162          |
| chr16 | 23692270  | G   | A   | PLK1     | NON_SYNONYMOUS_CODING | MODERATE      | Ggg/Agg      | G205R             | 65            | 1             | 1,52            | 49           |
| chr16 | 21416379  | A   | G   | NPIPL3   | NON_SYNONYMOUS_CODING | MODERATE      | cTt/cCt      | L171P             | 151           | 2             | 1,31            | 132          |
| chr6  | 49494368  | G   | A   | GLYATL3  | STOP_GAINED           | HIGH          | tGg/tAg      | W203*             | 106           | 0             | 0               | 64           |
| chr1  | 27332626  | G   | C   | FAM46B   | NON_SYNONYMOUS_CODING | MODERATE      | Cgc/Ggc      | R363G             | 24            | 0             | 0               | 23           |
| chr2  | 1926367   | G   | A   | MYT1L    | NON_SYNONYMOUS_CODING | MODERATE      | Cgg/Tgg      | R392W             | 93            | 0             | 0               | 109          |

## Patient E4

| chrom | pos       | ref  | var | Gene           | Effect                | Effect Impact | Codon Change | Amino Acid Change | Normal reads1 | Normal reads2 | Normal var_freq | Tumor reads |
|-------|-----------|------|-----|----------------|-----------------------|---------------|--------------|-------------------|---------------|---------------|-----------------|-------------|
| chr13 | 28624291  | T    | C   | FLT3           | NON_SYNONYMOUS_CODING | MODERATE      | gAc/gGc      | D228G             | 108           | 3             | 2,7             | 44          |
| chr5  | 96320849  | C    | G   | LNPEP          | NON_SYNONYMOUS_CODING | MODERATE      | cCa/cGa      | P309R             | 84            | 3             | 3,45            | 49          |
| chr8  | 133144498 | C    | T   | KCNQ3          | NON_SYNONYMOUS_CODING | MODERATE      | Gta/Ata      | V605I             | 115           | 6             | 4,96            | 59          |
| chr4  | 55981173  | T    | C   | KDR            | NON_SYNONYMOUS_CODING | MODERATE      | Aga/Gga      | R176G             | 86            | 2             | 2,27            | 41          |
| chr18 | 28934818  | C    | T   | DSG1           | STOP_GAINED           | HIGH          | Cga/Tga      | R887*             | 83            | 4             | 4,6             | 51          |
| chr4  | 17707473  | G    | A   | FAM184B        | NON_SYNONYMOUS_CODING | MODERATE      | Cgg/Tgg      | R358W             | 86            | 4             | 4,44            | 47          |
| chr1  | 79121071  | G    | A   | IFI44          | NON_SYNONYMOUS_CODING | MODERATE      | Ggg/Agg      | G239R             | 63            | 3             | 4,55            | 40          |
| chr16 | 22926721  | G    | GA  | HS3ST2         | FRAME_SHIFT           | HIGH          | aaa/Aaaa     | K315K             | 36            | 0             | 0               | 24          |
| chr6  | 110620294 | TGCA | T   | C6orf186       | CODON_CHANGE          | MODERATE      | gtgcat/gat   | VH205D            | 73            | 4             | 5,19            | 33          |
| chr4  | 122682824 | C    | T   | TMEM155        | NON_SYNONYMOUS_CODING | MODERATE      | atG/atA      | M27I              | 69            | 1             | 1,43            | 53          |
| chr1  | 152732566 | C    | T   | KPRP           | NON_SYNONYMOUS_CODING | MODERATE      | Cgt/Tgt      | R168C             | 45            | 2             | 4,26            | 14          |
| chr17 | 80788031  | G    | A   | ZNF750         | NON_SYNONYMOUS_CODING | MODERATE      | gCc/gTc      | A720V             | 24            | 0             | 0               | 14          |
| chr22 | 50633332  | A    | G   | TRABD          | NON_SYNONYMOUS_CODING | MODERATE      | Atc/Gtc      | I95V              | 24            | 1             | 4               | 6           |
| chr9  | 99404121  | T    | G   | C9orf21        | NON_SYNONYMOUS_CODING | MODERATE      | Aaa/Caa      | K201Q             | 74            | 1             | 1,33            | 41          |
| chr14 | 23744800  | ACAT | A   | RP11-124D2.6.1 | CODON_CHANGE          | MODERATE      | gatgtg/gtg   | DV547V            | 13            | 0             | 0               | 9           |
| chr12 | 42512938  | T    | A   | GXYLT1         | NON_SYNONYMOUS_CODING | MODERATE      | cAt/cTt      | H117L             | 40            | 0             | 0               | 32          |
| chr17 | 72324574  | G    | A   | KIF19          | NON_SYNONYMOUS_CODING | MODERATE      | cGg/cAg      | R17Q              | 20            | 0             | 0               | 9           |
| chr12 | 42512924  | C    | T   | GXYLT1         | NON_SYNONYMOUS_CODING | MODERATE      | Gcc/Acc      | A122T             | 41            | 0             | 0               | 37          |
| chr15 | 33192236  | G    | T   | FMN1           | NON_SYNONYMOUS_CODING | MODERATE      | Caa/Aaa      | Q1200K            | 89            | 1             | 1,11            | 71          |
| chr5  | 140188559 | C    | T   | PCDHA4         | NON_SYNONYMOUS_CODING | MODERATE      | gCg/gTg      | A596V             | 22            | 1             | 4,35            | 6           |
| chr2  | 215854314 | G    | T   | ABCA12         | NON_SYNONYMOUS_CODING | MODERATE      | gCa/gAa      | A1219E            | 66            | 0             | 0               | 66          |

## Patient E5

| chrom | position  | ref | var | Gene   | Effect   | Amino Acid Change | Normal reads1 | Normal reads2 | Normal var_freq | Tumor reads1 | Tumor reads2 | Tumor var_freq |
|-------|-----------|-----|-----|--------|----------|-------------------|---------------|---------------|-----------------|--------------|--------------|----------------|
| 8     | 6366477   | T   | C   | ANGPT2 | missense | K436E             | 73            | 0             | 0               | 56           | 29           | 34,12          |
| 11    | 20948885  | T   | A   | NELL1  | nonsense | L264*             | 67            | 0             | 0               | 60           | 22           | 26,83          |
| 4     | 156760015 | C   | T   | ACCN5  | missense | G339E             | 83            | 0             | 0               | 66           | 18           | 21,43          |
| 13    | 36878743  | G   | A   | SPG20  | missense | T587I             | 47            | 1             | 2,08            | 34           | 15           | 30,61          |
| 7     | 14758275  | G   | A   | DGKB   | missense | R120W             | 36            | 0             | 0               | 23           | 10           | 30,3           |

## Patient E6

| chrom | position  | ref | var | Gene   | Effect   | Amino Acid Change | Normal reads1 | Normal reads2 | Normal var_freq | Tumor reads1 | Tumor reads2 | Tumor var_freq |
|-------|-----------|-----|-----|--------|----------|-------------------|---------------|---------------|-----------------|--------------|--------------|----------------|
| 8     | 56711628  | T   | G   | TGS1   | missense | N566K             | 100           | 0             | 0               | 62           | 38           | 38             |
| 17    | 56276945  | C   | T   | EPX    | missense | R443W             | 57            | 0             | 0               | 23           | 26           | 53,06          |
| 14    | 99723858  | T   | C   | BCL11B | missense | H126R             | 33            | 0             | 0               | 21           | 22           | 51,16          |
| 14    | 21360276  | G   | A   | RNASE3 | missense | R144Q             | 46            | 0             | 0               | 35           | 22           | 38,6           |
| 14    | 25043007  | C   | T   | CTSG   | missense | G202R             | 32            | 0             | 0               | 18           | 17           | 48,57          |
| 8     | 117868903 | C   | T   | RAD21  | missense | E266K             | 63            | 1             | 1,56            | 43           | 16           | 27,12          |
| 2     | 218954691 | C   | A   | RUFY4  | missense | L544I             | 27            | 0             | 0               | 10           | 8            | 44,44          |

## Patient E7

| chrom | position  | ref | var | Gene    | Effect      | Amino Acid Change | Normal reads1 | Normal reads2 | Normal var_freq | Tumor reads1 | Tumor reads2 | Tumor var_freq |
|-------|-----------|-----|-----|---------|-------------|-------------------|---------------|---------------|-----------------|--------------|--------------|----------------|
| 2     | 125284860 | A   | T   | CNTNAP5 | splice-3    | -                 | 80            | 1             | 1,23            | 34           | 24           | 41,38          |
| 4     | 20543120  | G   | A   | SLIT2   | stop-gained | W674*             | 46            | 1             | 2,13            | 19           | 23           | 54,76          |
| 15    | 41352080  | T   | A   | INO80   | missense    | R609S             | 55            | 0             | 0               | 21           | 16           | 43,24          |
| 10    | 33510758  | C   | T   | NRP1    | missense    | V391M             | 59            | 0             | 0               | 27           | 16           | 37,21          |
| 16    | 20355365  | C   | T   | UMOD    | missense    | A438T             | 36            | 0             | 0               | 22           | 15           | 40,54          |
| 11    | 3050595   | T   | C   | CARS    | missense    | I294V             | 25            | 0             | 0               | 9            | 9            | 50             |
| 10    | 5436190   | C   | A   | TUBAL3  | missense    | V171L             | 42            | 0             | 0               | 20           | 6            | 23,08          |
| 15    | 42059521  | A   | T   | MGA     | utr-3       | -                 | 8             | 1             | 11,11           | 2            | 7            | 77,78          |
| 16    | 71317453  | A   | T   | FTSJD1  | utr-3       | -                 | 14            | 0             | 0               | 6            | 5            | 45,45          |
| 13    | 27256838  | G   | A   | WASF3   | missense    | V360I             | 26            | 1             | 3,7             | 14           | 7            | 33,33          |

Abbreviations: var, variant base; ref, reference base

<sup>1</sup> Sequencing reads supporting reference allele in normal sample

<sup>2</sup> Sequencing reads supporting variant allele in normal sample

<sup>3</sup> Sequencing reads supporting reference allele in tumor sample

<sup>4</sup> Sequencing reads supporting variant allele in tumor sample

\* Somatic p-value for somatic/loss of heterozygosity events

**Supplemental table S3. Primers for qPCR**

| <b>Target gene</b> | <b>Sequence</b>           | <b>PCR fragment size</b> |
|--------------------|---------------------------|--------------------------|
| GAPDH-F            | AGCACCCCTGGCCAAGGTCA      | 108bp                    |
| GAPDH-R            | CCGGAGGGGCCATCCACAGT      |                          |
| SOCS3-F            | CTTCGATTCGGGACCAGCCCCC    | 135bp                    |
| SOCS3-R            | GGCGGCGGGAAACTTGCTGT      |                          |
| STAT3-F            | AGCGAGGACTGAGCATCGAGCA    | 125bp                    |
| STAT3-R            | GCCCTTGCCAGCCATGTTTTCTTTG |                          |
| MYC-F              | CAGCTGCTTAGACGCTGGATT     | 131bp                    |
| MYC-R              | GTAGAAATACGGCTGCACCGA     |                          |
| JAK2-F             | GCTCAGTGGCGGCATGAT        | 87bp                     |
| JAK2-R             | CACTGCCATCCCAAGACATTC     |                          |
| JUNB-F             | TGGTGGCCTCTCTACACGA       | 66bp                     |
| JUNB-R             | GGGTCGGCCAGGTTGAC         |                          |
| CCL2-F             | GTCTCTGCCGCCCTTCTGT       | 76bp                     |
| CCL2-R             | TTGCATCTGGCTGAGCGAG       |                          |
| BCL3-F             | CCACAGACGGTAATGTGGTG      | 143bp                    |
| BCL3-R             | TATTGCTGTGGTGCAGGGTA      |                          |
| PGK1-F             | CCCAGCTGTATTTCCAAAATGTCGC | 148bp                    |
| PGK1-R             | ACAGCAGCCTTAATCCTCTGGTTGT |                          |
| LDHA-F             | CTCTGAAGACTCTGCACCCA      | 124bp                    |
| LDHA-R             | GCCCAGGATGTGTAGCCTTT      |                          |
| NONO-F             | GCTCTGGACAGATGCAGTGAA     | 150bp                    |
| NONO-R             | CTGCTCTCGTTCCTTGTGAA      |                          |
